# Supplementary material for: Effectiveness of Metacognitive Regulation Intervention on Attention-Deficit–Hyperactivity Disorder Students’ Scientific Ability and Motivation
Source: Frontiers journal article supplement (doi:10.3389/fpsyg.2021.747961), 2021-12-23
Supplement: Data_Sheet_1.pdf [file Data_Sheet_1.pdf]

## Appendix I

### Learning Content for 16 Science Lessons

| Module I Earth Knowledge     | Content                                                                         |
|------------------------------|---------------------------------------------------------------------------------|
| 1                            | 昼夜交替现象( Alternating day and night phenomenon)                                   |
| 2                            | 人类认识地球及其运动的历史(Human understanding of the history of the earth and its movement) |
| 3                            | 证明地球在自转(Prove the Earth's rotation)                                             |
| 4                            | 谁先迎来黎明(Who will usher in the dawn first)                                        |
| 5                            | 北极星“不动”的秘密(The secret of Polaris "not moving" )                                 |
| 6                            | 地球在公转吗(Is the earth in orbit)                                                   |
| 7                            | 为什么一年有四季(Why there are four seasons a year)                                     |
| 8                            | 极昼和极夜的解释(Explanation of polar day and night)                                    |
| Module 2 Astronomy Knowledge |                                                                                 |
| 1                            | 地球的卫星-月球(Earth's satellite-Lunar)                                               |
| 2                            | 月相变化(Lunar phase changes)                                                       |

|   |                                 |
|---|---------------------------------|
| 3 | 我们来造环形山(Let's build a crater)   |
| 4 | 日食和月食(Solar and lunar eclipses) |
| 5 | 太阳系(Solar system)               |
| 6 | 在星空中(In the stars)              |
| 7 | 探索宇宙(Explore the universe)      |

## Appendix II

### *Example Items for each Category of Metacognition Reflection Principles*

| Principles | Category   | Example Guideline on Worksheet                                                                                                                                                                                                                  |
|------------|------------|-------------------------------------------------------------------------------------------------------------------------------------------------------------------------------------------------------------------------------------------------|
|            | Monitoring | <ol style="list-style-type: none"><li>1. The track assessment of the learning goals</li><li>2. The situation of your learning progress in the overall learning procedure</li><li>3. Adjustment method to adjust the learning activity</li></ol> |
|            | Evaluating | <ol style="list-style-type: none"><li>1. Performance evaluation in the learning activity</li><li>2. The assessment on study product</li><li>3. The study design is acceptable for the following reasons</li></ol>                               |
